# Supplementary material for: Evaluation of Salivary Biomarkers of Periodontal Disease Based on Smoking Status: A Systematic Review
Source: MDPI journal article supplement (doi:10.3390/ijerph192114619), 2022-11-07
Supplement: s1 [file s1]

# Supporting Information

**Table S1. Search strategy**

| Plain text / natural language                                                                                                                                                                  | Controlled vocabulary (MeSH)       |
|------------------------------------------------------------------------------------------------------------------------------------------------------------------------------------------------|------------------------------------|
| <b>Terms for target condition: periodontal disease</b>                                                                                                                                         |                                    |
| Periodontal diseases*<br>Parodontos*<br>Pyorrhea Alveolaris                                                                                                                                    | Periodontal disease                |
| Furcation Defect                                                                                                                                                                               | Furcation Defects                  |
| Gingival Diseases*<br>Epuli*<br>Gingivos*                                                                                                                                                      | Gingival Diseases                  |
| Gingival Hemorrhag*                                                                                                                                                                            | Gingival Hemorrhage                |
| Gingival Neoplas*<br>Congenital Epuli*                                                                                                                                                         | Gingival Neoplasms                 |
| Gingival Overgrowt*                                                                                                                                                                            | Gingival Overgrowth                |
| Gingival Hypertroph*                                                                                                                                                                           | Gingival Hypertrophy               |
| Gingival Hyperplasi*                                                                                                                                                                           | Gingival Hyperplasia               |
| Gingival Fibromatos*<br>Fibromatosis Gingivae                                                                                                                                                  | Fibromatosis, Gingival             |
| Gingival Recessio*<br>Gingival Atroph*<br>Atrophy of Gingiva<br>Gingiva Atroph*                                                                                                                | Gingival Recession                 |
| Gingiviti*<br>Gingival inflammation                                                                                                                                                            | Gingivitis                         |
| Vincent Infection<br>Vincent's Infection<br>Fusospirochloa<br>Vincent's Stomatitis<br>Phagedenic Gingivitis<br>Vincent's Gingivitis<br>Trench Mouth<br>Vincent Angina<br>Ulcerative Stomatitis | Gingivitis, Necrotizing Ulcerative |
| Gingival Pocke*                                                                                                                                                                                | Gingival Pocket                    |
| Peri Implantiti*<br>Peri-Implantiti*<br>Periimplantiti*                                                                                                                                        | Peri-Implantitis                   |
| Periapical                                                                                                                                                                                     | Periapical Diseases                |
| Dental Granulom*                                                                                                                                                                               | Periapical Granuloma               |
| Periapical Absces*<br>Apical Alveolar Absces*<br>Dentoalveolar Absces*                                                                                                                         | Periapical Abscess                 |
| Periodontal Atrophies<br>Atrophy of Periodontium<br>Periodontium Atroph*<br>Gingivo-Osseous Atroph*                                                                                            | Periodontal Atrophy                |
| Periodontal Attachment Loss                                                                                                                                                                    | Periodontal Attachment Loss        |
| Gingival Recessio*<br>Gingival Atroph*<br>Atrophy of Gingiva<br>Gingiva Atroph*                                                                                                                | Gingival Recession                 |

| Plain text / natural language                                                                                                                                                                                          | Controlled vocabulary (MeSH) |
|------------------------------------------------------------------------------------------------------------------------------------------------------------------------------------------------------------------------|------------------------------|
| Alveolar Bone Los*<br>Alveolar Process Atroph*<br>Alveolar Resorptio*<br>Periodontal Bone Los*<br>Periodontal Resorptio*<br>Alveolar Bone Atroph*                                                                      | Alveolar Bone Loss           |
| Periodontal Cys*<br>Dental Root Cys*<br>Dentoalveolar Cys*<br>Lateral Cys*                                                                                                                                             | Periodontal Cyst             |
| Radicular Cys*<br>Periapical Cys*<br>Apical Periodontal Cys*                                                                                                                                                           | Radicular Cyst               |
| Periodontiti*<br>Pericementiti*                                                                                                                                                                                        | Periodontitis                |
| Aggressive Periodonti*<br>Circumpubertal Periodontitis<br>Prepubertal Periodontitis<br>Early-Onset Periodontiti*<br>Early Onset Periodontiti*<br>Juvenile Periodontiti*<br>Periodontos*                                | Aggressive Periodontitis     |
| Chronic Periodontiti*<br>Adult Periodontiti*                                                                                                                                                                           | Chronic Periodontitis        |
| Periapical Periodontiti*<br>Apical Periodontiti*<br>Acute Nonsuppurative Periodontiti*<br>Periapical Absces*<br>Apical Alveolar Absces*<br>Apical Dentoalveolar Absces*<br>Periapical Granulom*<br>Dental Granulom*    | Periapical Periodontitis     |
| Periodontal Pocke*                                                                                                                                                                                                     | Periodontal Pocket           |
| Periodontal Absces*                                                                                                                                                                                                    | Periodontal Abscess          |
| Tooth Los*                                                                                                                                                                                                             | Tooth Loss                   |
| Tooth Migration<br>Tooth Drif*                                                                                                                                                                                         | Tooth Migration              |
| Teeth Mesial Movement<br>Mesial Migration of Teeth<br>Teeth Mesial Migration<br>Mesial Drift of Teeth<br>Teeth Mesial Drift                                                                                            | Mesial Movement of Teeth     |
| Tooth Mobilit*                                                                                                                                                                                                         | Tooth Mobility               |
| Periodontal status<br>Periodontal Index<br>Periodontal Indices<br>Periodontal Indexes<br>Community Periodontal Index of Treatment Needs<br>CPITN<br>Gingival Bleeding on Probing<br>Gingival Index<br>Gingival Indices | Periodontal Index            |
| Periodontal evaluation                                                                                                                                                                                                 |                              |
| Stimulated saliva                                                                                                                                                                                                      |                              |
| 1 or 2 or 3 or ~ or 134 or 135 or 136                                                                                                                                                                                  |                              |
| <b>Terms for the type of oral sample analyzed: saliva</b>                                                                                                                                                              |                              |
| Saliv*                                                                                                                                                                                                                 | Saliva                       |
| 138 or 139                                                                                                                                                                                                             |                              |

| Plain text / natural language                                                                                                                                                                                                                                                                                                                                                                             | Controlled vocabulary (MeSH) |
|-----------------------------------------------------------------------------------------------------------------------------------------------------------------------------------------------------------------------------------------------------------------------------------------------------------------------------------------------------------------------------------------------------------|------------------------------|
| <b>Terms for the index tests: salivary biomarkers</b>                                                                                                                                                                                                                                                                                                                                                     |                              |
| <b>Saliva Enzymes</b>                                                                                                                                                                                                                                                                                                                                                                                     |                              |
| ALP<br>alkaline phosphatase                                                                                                                                                                                                                                                                                                                                                                               | Alkaline Phosphatase         |
| ACP<br>Acid Phosphatase<br>Acid beta-Glycerophosphate<br>Acid $\beta$ -glycerophosphate                                                                                                                                                                                                                                                                                                                   | Acid Phosphatase             |
| AST<br>Aspartate Aminotransferase<br>Aspartate Transaminase<br>Glutamic-Oxaloacetic Transaminase<br>Glutamic Oxaloacetic Transaminase<br>L-Aspartate-2-Oxoglutarate Aminotransferase<br>L Aspartate 2 Oxoglutarate Aminotransferase<br>Glutamate-Aspartate Transaminase<br>Glutamate Aspartate Transaminase<br>SGOT<br>Serum Glutamic-Oxaloacetic Transaminase<br>Serum Glutamic Oxaloacetic Transaminase | Aspartate Aminotransferases  |
| ALT<br>Alanine Transaminase<br>Glutamic-Alanine Transaminase<br>Glutamic Alanine Transaminase<br>Alanine-2-Oxoglutarate Aminotransferase<br>Alanine 2 Oxoglutarate Aminotransferase<br>ALAT<br>Alanine Aminotransferase<br>SGPT<br>Glutamic-Pyruvic Transaminase<br>Glutamic Pyruvic Transaminase<br>Glutamate-Pyruvate Transaminase<br>Glutamic-Pyruvic Transaminase                                     | Alanine Transaminase         |
| LDH<br>L-Lactate Dehydrogenase A<br>LDH-A<br>LDHA<br>L-Lactate Dehydrogenase B<br>LDH-B<br>LDHB<br>L-Lactate Dehydrogenase C<br>LDH-C<br>LDHC<br>L-Lactate Dehydrogenase<br>Lactate Dehydrogenase                                                                                                                                                                                                         | L-Lactate Dehydrogenase      |
| CRE<br>Creatinine                                                                                                                                                                                                                                                                                                                                                                                         | Creatinine                   |
| BUN<br>Blood Urea Nitrogen                                                                                                                                                                                                                                                                                                                                                                                | Blood Urea Nitrogen          |
| UA<br>Urea                                                                                                                                                                                                                                                                                                                                                                                                | Urea                         |
| F-Hb<br>Free-hemoglobin                                                                                                                                                                                                                                                                                                                                                                                   |                              |
| Neopterin<br>2-Amino-6-(1,2,3-trihydroxypropyl)-4(3H)-pteridinone<br>Monapterin                                                                                                                                                                                                                                                                                                                           | Neopterin                    |

| Plain text / natural language                                                                                                                                                                                                                                                                                              | Controlled vocabulary (MeSH)            |
|----------------------------------------------------------------------------------------------------------------------------------------------------------------------------------------------------------------------------------------------------------------------------------------------------------------------------|-----------------------------------------|
| MDA<br>Malondialdehyde<br>Propanedial<br>Malonyldialdehyde<br>Malonaldehyde<br>Malonylaldehyde                                                                                                                                                                                                                             | Malondialdehyde                         |
| GSHPx<br>Glutathione Peroxidase<br>Liperoxidase                                                                                                                                                                                                                                                                            | Glutathione Peroxidase                  |
| SOD<br>Superoxide dismutase<br>Erythrocuprein<br>Hemocuprein                                                                                                                                                                                                                                                               | Superoxide Dismutase                    |
| MMP-8<br>MMP8<br>Matrix Metalloproteinase-8<br>Matrix Metalloproteinase 8<br>Neutrophil Collagenase<br>Fibroblast Collagenase<br>Collagenase-2<br>Collagenase2                                                                                                                                                             | Matrix Metalloproteinase 8              |
| MMP-9<br>MMP9<br>Matrix Metalloproteinase-9<br>Matrix Metalloproteinase 9<br>92-kDa Type IV Collagenase<br>92 kDa Type IV Collagenase<br>92-kDa Gelatinase<br>92 kDa Gelatinase<br>Gelatinase B                                                                                                                            | Matrix Metalloproteinase 9              |
| TIMP-1<br>TIMP1<br>Tissue Inhibitor of Metalloproteinase-1<br>Tissue Inhibitor of Metalloproteinase 1                                                                                                                                                                                                                      | Tissue Inhibitor of Metalloproteinase-1 |
| MPO<br>Myeloperoxidase<br>Peroxidase                                                                                                                                                                                                                                                                                       | Peroxidase                              |
| IL-1 $\beta$<br>Interleukin-1beta<br>Interleukin 1beta<br>IL-1 beta<br>Interleukin-1 beta<br>Interleukin 1 beta<br>Catabolin                                                                                                                                                                                               | Interleukin-1 beta                      |
| IL-6<br>Interleukin-6<br>IL6<br>B-Cell Stimulatory Factor-2<br>B-Cell Differentiation Factor-2<br>BSF-2<br>Hybridoma Growth Factor<br>IFN-beta 2<br>Plasmacytoma Growth Factor<br>Hepatocyte-Stimulating Factor<br>MGI-2<br>Myeloid Differentiation-Inducing Protein<br>B-Cell Differentiation Factor<br>Interferon beta-2 | Interleukin-6                           |

| Plain text / natural language                                                                                                                                                                                                                                                                                                                                                                                                     | Controlled vocabulary (MeSH)     |
|-----------------------------------------------------------------------------------------------------------------------------------------------------------------------------------------------------------------------------------------------------------------------------------------------------------------------------------------------------------------------------------------------------------------------------------|----------------------------------|
| IL-8<br>IL8<br>Interleukin 8<br>Interleukin-8<br>Monocyte-Derived Neutrophil Chemotactic Factor<br>Neutrophil Activation Factor<br>Lymphocyte-Derived Neutrophil-Activating Peptide<br>Monocyte-Derived Neutrophil-Activating Peptide<br>Alveolar Macrophage Chemotactic Factor-I<br>AMCF-I<br>Anionic Neutrophil-Activating Peptide<br>Chemokine CXCL8<br>Macrophage-Derived Chemotactic Factor<br>Neutrophil Chemotactic Factor | Interleukin-8                    |
| TNF-a<br>Tumor Necrosis Factor Blockers<br>TNF Inhibitors<br>TNF Blockers<br>Tumor Necrosis Factor Blocker<br>Tumor Necrosis Factor Antagonist<br>Tumor Necrosis Factor Inhibitor<br>TNF Antagonist<br>TNF Blocker<br>TNF Inhibitor<br>Tumor Necrosis Factor Antagonists<br>TNF Antagonists<br>Tumor Necrosis Factor-a                                                                                                            | Tumor Necrosis Factor Inhibitors |
| Lysozyme<br>N-Acetylmuramide Glycanhydrolase                                                                                                                                                                                                                                                                                                                                                                                      | Muramidase                       |
| Leukocyte Elastase<br>Neutrophil Elastase<br>Polymorphonuclear Leukocyte Elastase<br>Neutrophil Elastase<br>PMN Elastase<br>Granulocyte Elastase<br>Lysosomal Elastase                                                                                                                                                                                                                                                            | Leukocyte Elastase               |
| Lymphocyte<br>Lymphoid Cell                                                                                                                                                                                                                                                                                                                                                                                                       | Lymphocytes                      |
| Uric Acid<br>Trioxopurine<br>Urate                                                                                                                                                                                                                                                                                                                                                                                                | Uric Acid                        |
| 8-iso PGF2α<br>8-isoprostaglandin F2a                                                                                                                                                                                                                                                                                                                                                                                             | Dinoprost                        |
| <b>&lt; Integration concepts of Saliva Enzymes&gt;</b><br>141 or 142 or 143 or ~ or 318 or 319 or 320                                                                                                                                                                                                                                                                                                                             |                                  |
| <b>Immunoglobulin (Ig)</b>                                                                                                                                                                                                                                                                                                                                                                                                        |                                  |
| Immunoglobulin A<br>IgA                                                                                                                                                                                                                                                                                                                                                                                                           | Immunoglobulin A                 |
| Immunoglobulin D<br>IgD<br>IgD1<br>IgD2                                                                                                                                                                                                                                                                                                                                                                                           | Immunoglobulin D                 |
| Immunoglobulin E<br>IgE                                                                                                                                                                                                                                                                                                                                                                                                           | Immunoglobulin E                 |
| Immunoglobulin G<br>IgG                                                                                                                                                                                                                                                                                                                                                                                                           | Immunoglobulin G                 |
| Immunoglobulin M<br>IgM                                                                                                                                                                                                                                                                                                                                                                                                           | Immunoglobulin M                 |
| <b>&lt; Integration concepts of immunoglobulin&gt;</b><br>322 or 323 or 324 or ~ 336 or 337 or 338                                                                                                                                                                                                                                                                                                                                |                                  |

| Plain text / natural language                                                                                                                                           | Controlled vocabulary (MeSH) |
|-------------------------------------------------------------------------------------------------------------------------------------------------------------------------|------------------------------|
| <b>Hormones</b>                                                                                                                                                         |                              |
| Cotinine<br>Scotine                                                                                                                                                     | Cotinine                     |
| Cortisol<br>Hydrocortisone                                                                                                                                              | Hydrocortisone               |
| <Integration concepts of terms for hormones><br>340 or 341 or 342 or 343 or 344 or 345                                                                                  |                              |
| <Integration concepts of terms for the index tests><br>321 or 339 or 346                                                                                                |                              |
| <b>Terms for target condition AND</b><br><b>Terms for the type of oral sample analyzed AND</b><br>Terms for the index tests: salivary biomarkers<br>137 AND 140 AND 347 |                              |
| 348 NOT ("review"[Publication Type] OR "review literature as topic"[MeSH Terms])                                                                                        |                              |
